# Supplementary material
Source: PubMed Central journal article supplement (PMC1568924)
Supplement: pnas_0603994103_1.pdf [file pnas_0603994103_1.pdf]

## Supporting Text

# 1 Full Derivation of the Systematic Perturbation Expansion

## 1.1 Notation

To shorten the notation, we write  $da(x, t) = r(x, t)dt + d\eta(x, t)$ , where

$$r(x, t) = f(\mathcal{D} \star a)(x, t) - \mu a(x, t) - \alpha(\mathcal{C} \star a)(x, t)a(x, t),$$

so that we may write  $ds(x, t) = da(x, t) - dq(t) = r(x, t)dt - dq(t) + d\eta(x, t)$ . We shorten the notation further by writing  $a_i = a(x_i, t)$ ,  $s_i = s(x_i, t)$ ,  $ds_i = ds(x_i, t)$ ,  $d\eta_i = d\eta(x_i, t)$  and  $r_i = r(x_i, t)$ . Furthermore, as we need not consider time lags while deriving the perturbation expansion, we will drop the time  $t$  from the arguments of all functions.

As described above, we denote by  $G_n$  the  $n$ th-order central moment,

$$G_n(x_1, \dots, x_n) = E[s_1 \cdots s_n],$$

and by  $G_n^*(x_1, \dots, x_n)$  the  $n$ th-order residual moment, which can be considered as the novel part of the  $n$ th-order moment. We denote by  $Z_n$  the  $n$ th-order raw moment

$$Z_n(x_1, \dots, x_n) = E[a_1 \cdots a_n].$$

As none of the moments depend on the absolute position, we may set the first spatial coordinate, e.g., to zero without loss of generality. To do so, we define the moments  $g_n$ ,  $g_n^*$ , and  $z_n$  by

$$G_n(x_1, \dots, x_n) = g_n(x_2 - x_1, \dots, x_n - x_1),$$

$$G_n^*(x_1, \dots, x_n) = g_n^*(x_2 - x_1, \dots, x_n - x_1),$$

$$Z_n(x_1, \dots, x_n) = z_n(x_2 - x_1, \dots, x_n - x_1).$$

We note that as the arguments of the moments with capital letters can be freely permuted, so can the ones with small letters. Also, the sign of any argument can be changed, if the argument

is at the same time subtracted from the other arguments, so that, e.g.,

$$g_n(x_1, \dots, x_{n-1}) = g_n(-x_1, x_2 - x_1, \dots, x_{n-1} - x_1).$$

For functions with several arguments, we denote the convolution with respect to the first argument simply by  $\star$ , so that, e.g.,

$$(\mathcal{D} \star G_2)(x_1, x_2) = \int C(x_1 - x)G(x, x_2)dx.$$

We note the identities

$$\begin{aligned} (\mathcal{D} \star G_2)(x_1, x_2) &= (\mathcal{D} \star g_2)(x_1 - x_2), \\ (\mathcal{D} \star G_3)(x_1, x_2, x_3) &= (\mathcal{D} \star g_3)(x_1 - x_2, x_3 - x_2), \\ (\mathcal{D} \star G_4)(x_1, x_2, x_3, x_4) &= (\mathcal{D} \star g_4)(x_1 - x_2, x_3 - x_2, x_4 - x_2). \end{aligned}$$

## 1.2 The Covariance of the Noise

To assess the covariance of the noise, we consider a discretization of the domain to sites of size  $dx$ . Assuming that a site has at time  $t$   $k$  individuals (as  $dx$  is small, we either have  $k = 0$  or  $k = 1$ ), Table 1 lists the possible events that may take place before time  $t + dt$ . As the noise  $d\eta$  is independent at different sites and times, we obtain  $E[d\eta(x)d\eta(x', t')] = V(t)\delta(x-x')\delta(t-t')dt$ , where

$$V(t) = (f + \mu)q(t) + \alpha q(t)^2 + R(t). \quad (1)$$

## 1.3 The Decompositions of the Central Moments

We start by deriving Eqs. 4-6 in the main text that decompose the central moments into a sum of the lower-order moments and the residual moment. The decompositions are constructed in such a way that the residual moments satisfy two conditions, which we call conditions (C1) and (C2). The condition (C1) requires that the residual moment is smooth, so that it does not

contain any delta distributions. The condition (C2) requires that the residual moment vanishes if the maximum distance between any of the points diverges.

### 1.3.1 The second moment

The second raw moment can be written as

$$Z_2(x_1, x_2) = Z_2^*(x_1, x_2) + q\delta(x_1 - x_2), \quad (2)$$

where

$$Z_2^*(x_1, x_2) = q^2 + G_2^*(x_1, x_2)$$

refers to the case in which the two points do not coincide. To verify condition (C1), we consider a discretization of the domain to sites of size  $dx$ , where  $dx$  is so small that each site can be assumed to contain at most one individual. Thus, a site at  $x_i$  has an individual with probability  $qdx$ , in which case  $a_i = 1/dx$ , and is empty ( $a_i = 0$ ) with probability  $1 - qdx$ . If  $x_1 = x_2$ , we have  $E(a_1 a_2) = qdx(1/dx)^2$ . As  $(1/dx)$  translates at the limit  $dx \rightarrow 0$  to a delta distribution, we obtain  $Z_2(x_1, x_2) = q\delta(x_1 - x_2)$ . To see that the condition (C2) holds, we note that if  $|x_1 - x_2| \rightarrow \infty$ , then  $a_1$  and  $a_2$  become independent, and we should have  $Z_2(x_1, x_2) \rightarrow q^2$ , which is true with Eq. 2. As  $Z_2(x_1, x_2) = q^2 + G_2(x_1, x_2)$ , we obtain Eq. 4 in the main text.

### 1.3.2 The third moment

The third raw moment can be written as

$$\begin{aligned} Z_3(x_1, x_2, x_3) &= Z_3^*(x_1, x_2, x_3) + \sum_{\{i,j,k\} \in P} Z_2^*(x_i, x_k) \delta(x_i - x_j) \\ &+ q\delta(x_1 - x_2) \delta(x_1 - x_3), \end{aligned} \quad (3)$$

where

$$\begin{aligned} Z_3^*(x_1, x_2, x_3) &= q^3 + q \sum_{\{i,j,k\} \in P} G_2^*(x_i, x_j) \\ &+ G_3^*(x_1, x_2, x_3) \end{aligned} \quad (4)$$

refers to the case in which none of the three points coincide. To see that condition (C1) holds, we need to consider two cases, as either all of the points or two of the points may coincide. First, if all the three points coincide, the reasoning goes exactly as above, and we obtain  $Z_3(x_1, x_2, x_3) = q\delta(x_1 - x_2)\delta(x_1 - x_3)$ . There are three permutations (P) by which two of the points can coincide. For example, if  $x_1 = x_2 \neq x_3$ , we have  $Z_3(x_1, x_2, x_3) = (q/dx)E[a_3|a_1 = 1/dx]$ . To assess the conditional expectation, we note that

$$\begin{aligned} Z_2^*(x_1, x_3) &= E[a_1 a_3] \\ &= E[a_3|a_1 = 0]0P(a_1 = 0) + E[a_3|a_1 = 1/dx](1/dx)P(a_1 = 1/dx) \\ &= qE[a_3|a_1 = 1/dx], \end{aligned}$$

and thus  $E[a_3|a_1 = 1/dx] = Z_2^*(x_1, x_3)/q$ , which gives  $Z_3(x_1, x_2, x_3) = (1/dx)Z_2^*(x_1, x_3) \rightarrow Z_2^*(x_1, x_3)\delta(x_1 - x_2)$ .

To verify condition (C2), we may now assume that the three points are disjoint. If e.g.  $x_1$  diverges from the other points ( $|x_1 - x_i| \rightarrow \infty$  for  $i = 2, 3$ ), we should have  $Z_3^*(x_1, x_2, x_3) \rightarrow qZ_2^*(x_2, x_3) = q^3 + qG_2^*(x_2, x_3)$ , as is the case with Eq. 3 if  $G_3^*(x_1, x_2, x_3) \rightarrow 0$ . Note that  $x_i$  diverging includes also the possibility that all of the points diverge, in which case  $Z_3(x_1, x_2, x_3) \rightarrow q^3$ . As

$$Z_3(x_1, x_2, x_3) = q^3 + q\sum_{\{i,j,k\} \in P} G_2(x_i, x_j) + G_3(x_1, x_2, x_3),$$

we obtain Eq. 5 in the main text.

### 1.3.3 The fourth moment

The fourth raw moment can be written as

$$\begin{aligned} Z_4(x_1, x_2, x_3, x_4) &= Z_4^*(x_1, x_2, x_3, x_4) \\ &\quad + q\delta(x_1 - x_2)\delta(x_1 - x_3)\delta(x_1 - x_4) \end{aligned}$$

$$\begin{aligned}
& + \sum_{\{i,j,k,l\} \in P_4} Z_2^*(x_i, x_j) \delta(x_j - x_k) \delta(x_j - x_l) \\
& + \sum_{\{i,j,k,l\} \in P_6} Z_3^*(x_i, x_k, x_l) \delta(x_i - x_j) \\
& + \sum_{\{i,j,k,l\} \in P_3} Z_2^*(x_i, x_k) \delta(x_i - x_j) \delta(x_k - x_l), \tag{5}
\end{aligned}$$

where

$$\begin{aligned}
Z_4^*(x_1, x_2, x_3, x_4) & = q^4 + q \sum_{\{i,j,k,l\} \in P_4} G_3^*(x_j, x_k, x_l) \\
& + \sum_{\{i,j,k,l\} \in P_3} G_2^*(x_i, x_j) G_2^*(x_k, x_l) \\
& + q^2 \sum_{\{i,j,k,l\} \in P_6} G_2^*(x_i, x_j) \\
& + G_4^*(x_1, x_2, x_3, x_4) \tag{6}
\end{aligned}$$

again refers to the case in which none of the points coincide. To see that condition (C1) holds, we need to consider four possibilities. First, if all the four points coincide, we obtain  $Z_4(x_1, x_2, x_3, x_4) = q\delta(x_1 - x_2)\delta(x_1 - x_3)\delta(x_1 - x_4)$ . Second, three of the points may coincide, for which option there are  $P_4$  permutations. For example, if  $x_1 \neq x_2 = x_3 = x_4$ , we have  $Z_4(x_1, x_2, x_3, x_4) = (q/dx^2)E[a_1|a_2 = 1/dx] = (1/dx^2)Z_2^*(x_1, x_2) \rightarrow Z_2^*(x_1, x_2)\delta(x_2 - x_3)\delta(x_2 - x_4)$ . Third, two of the points may coincide, while the other two are separate. For this option the relevant permutations are given by  $P_6$ . For example, if  $x_1 = x_2$  while  $x_3 \neq x_4$ ,  $x_3 \neq x_1$  and  $x_4 \neq x_1$ , we have  $Z_4(x_1, x_2, x_3, x_4) = (q/dx)E[a_3a_4|a_1 = 1/dx]$ . To assess the conditional expectation, we note that

$$\begin{aligned}
Z_3^*(x_1, x_3, x_4) & = E[a_1a_3a_4] \\
& = E[a_3a_4|a_1 = 0]0P(a_1 = 0) + E[a_3a_4|a_1 = 1/dx](1/dx)P(a_1 = 1/dx) \\
& = qE[a_3a_4|a_1 = 1/dx].
\end{aligned}$$

Thus,  $Z_4(x_1, x_2, x_3, x_4) = (1/dx)Z_3^*(x_1, x_3, x_4) \rightarrow \delta(x_1 - x_2)Z_3^*(x_1, x_3, x_4)$ . The fourth alternative is that there are two pairs of coinciding points, for which option the relevant permutations are given by  $P_3$ . For example, if  $x_1 = x_2 \neq x_3 = x_4$ , we have  $Z_4(x_1, x_2, x_3, x_4) =$

$(q/dx)E[a_3^2|a_1 = 1/dx]$ . To assess the conditional expectation, we note that

$$E[a_3|a_1 = 1/dx] = P[a_3 = 0|a_1 = 1/dx]0 + P[a_3 = 1/dx|a_1 = 1/dx](1/dx),$$

and thus

$$P[a_3 = 1/dx|a_1 = 1/dx] = dx E[a_3|a_1 = 1/dx] = (dx/q)Z_2^*(a_1, a_3),$$

which gives

$$\begin{aligned} E[a_3^2|a_1 = 1/dx] &= P[a_3 = 1/dx|a_1 = 1/dx](1/dx)^2 \\ &= (1/q)(1/dx)Z_2^*(a_1, a_3). \end{aligned}$$

Thus,  $Z_4(x_1, x_2, x_3, x_4) = (1/dx)^2 Z_2^*(a_1, a_3) \rightarrow Z_2^*(a_1, a_3)\delta(x_1 - x_2)\delta(x_3 - x_4)$ .

To see that condition (C2) holds, we may now assume that none of the points coincide. There are two alternatives by which the maximum distance between the points may diverge, as either one point may diverge from all the other points, or then a pair of points may diverge from another pair of points. First, assume that the distance between a single point (say  $x_1$ , there are  $P_4$  permutations) and the other points diverges (not restricting whether the three remaining points stay close to each other or diverge from each other). We should have  $Z_4(x_1, x_2, x_3, x_4)^* \rightarrow qZ_3^*(x_2, x_3, x_4)$ , which is consistent with Eq. 5. Second, it may be that two pairs of points diverge from each other (not restricting whether the points within the pairs stay close to each other or not). For example, if  $x_1$  and  $x_2$  diverge from  $x_3$  and  $x_4$  (there are  $P_3$  permutations), we should have  $Z_4(x_1, x_2, x_3, x_4)^* \rightarrow Z_2^*(x_1, x_2)Z_2^*(x_3, x_4)$ , again consistent with Eq. 5. As

$$\begin{aligned} Z_4(x_1, x_2, x_3, x_4) &= q^4 + q^2 \sum_{\{i,j,k,l\} \in P_6} G_2(x_i, x_j) \\ &+ q \sum_{\{i,j,k,l\} \in P_4} G_3(x_j, x_k, x_l) + G_4(x_1, x_2, x_3, x_4), \end{aligned}$$

as

$$\sum_{\{i,j,k,l\} \in P_4} G_3(x_j, x_k, x_l) = q \sum_{\{i,j,k,l\} \in P_4} \delta(x_j - x_k)\delta(x_j - x_l)$$

$$\begin{aligned}
& + \sum_{\{i,j,k,l\} \in P_4} G_3^*(x_j, x_k, x_l) \\
& + \sum_{\{i,j,k,l\} \in P_6} [G_2^*(x_i, x_k) + G_2^*(x_i, x_l)] \delta(x_i - x_j),
\end{aligned}$$

and as

$$\begin{aligned}
& \sum_{\{i,j,k,l\} \in P_6} Z_3^*(x_i, x_k, x_l) \delta(x_i - x_j) \\
= & q^3 \sum_{\{i,j,k,l\} \in P_6} \delta(x_i - x_j) \\
& + \sum_{\{i,j,k,l\} \in P_6} G_3^*(x_i, x_k, x_l) \delta(x_i - x_j) \\
& + q \sum_{\{i,j,k,l\} \in P_6} [G_2^*(x_i, x_k) + G_2^*(x_i, x_l) + G_2^*(x_k, x_l)] \delta(x_i - x_j),
\end{aligned}$$

we obtain Eq. 6 in the main text.

## 1.4 The Exact Equations for Central Moments

### 1.4.1 Mean

Using the notation of Eq. 8 in the main text,

$$da = [f(\mathcal{D} \star a) - \mu a - \alpha(\mathcal{C} \star a)a]dt + d\eta,$$

from which we get

$$\begin{aligned}
dq & = E[da(x)] \\
& = E[f(\mathcal{D} \star a) - \mu a - \alpha(\mathcal{C} \star a)a]dt,
\end{aligned}$$

and thus the exact equation for first moment (Eq. 1 in the main text) is

$$\frac{dq}{dt} = (f - \mu)q - \alpha q^2 - R,$$

where

$$\begin{aligned}
R & = \alpha E[(\mathcal{C} \star s)(x)s(x)] \\
& = \alpha(\mathcal{C} \star G_2)(x, x) \\
& = \alpha(\mathcal{C} \star g_2)(0).
\end{aligned}$$

### 1.4.2 Second moment

We have

$$\begin{aligned}
 dG_2(x_1, x_2) &= G_2(x_1, x_2, t + dt) - G_2(x_1, x_2) \\
 &= E[(s_1 + ds_1)(s_2 + ds_2)] - G_2(x_1, x_2) \\
 &= E[s_1 ds_2] + E[s_2 ds_1] + E[ds_1 ds_2].
 \end{aligned}$$

First,

$$\begin{aligned}
 E[s_1 ds_2] &= E[s_1 r_2 dt] \\
 &= E[s_1 (f(\mathcal{D} \star a)(x_2) - \mu a(x_2) - \alpha(\mathcal{C} \star a)(x_2) a(x_2))] dt.
 \end{aligned}$$

Thus,

$$\begin{aligned}
 E[s_1 ds_2]/dt &= f(\mathcal{D} \star G_2)(x_2, x_1) - \mu G_2(x_1, x_2) \\
 &\quad - \alpha q [G_2(x_1, x_2) + (\mathcal{C} \star G_2)(x_2, x_1)] - R_2(x_1, x_2),
 \end{aligned}$$

where

$$\begin{aligned}
 R_2(x_1, x_2) &= \alpha E[s(x_1) s(x_2) (\mathcal{C} \star s)(x_2)] \\
 &= \alpha (\mathcal{C} \star G_3)(x_2, x_2, x_1) \\
 &= \alpha (\mathcal{C} \star g_3)(0, x_1 - x_2).
 \end{aligned}$$

Second,

$$E[ds_1 ds_2] = E[d\eta_1 d\eta_2] = V \delta(x_1 - x_2) dt.$$

Thus,

$$\begin{aligned}
 \frac{dG_2(x_1, x_2)}{dt} &= f[(\mathcal{D} \star G_2)(x_1, x_2) + (\mathcal{D} \star G_2)(x_2, x_1)] - 2\mu G_2(x_1, x_2) \\
 &\quad - 2\alpha q G_2(x_1, x_2) - \alpha q [(\mathcal{C} \star G_2)(x_1, x_2) + (\mathcal{C} \star G_2)(x_2, x_1)] \\
 &\quad + V \delta(x_1 - x_2) - R_2(x_1, x_2) - R_2(x_2, x_1).
 \end{aligned}$$

Accounting for the symmetry, we obtain

$$\begin{aligned}\frac{dg_2(x)}{dt} &= 2f(\mathcal{D} \star g_2)(x) - 2\mu g_2(x) - 2\alpha q[g_2(x) + (\mathcal{C} \star g_2)(x)] \\ &+ V\delta(x) - 2r_2(x),\end{aligned}$$

where

$$\begin{aligned}r_2(x) &= R_2(x', x + x') \\ &= \alpha(\mathcal{C} \star g_3)(0, x).\end{aligned}$$

### 1.4.3 Third moment

We have

$$\begin{aligned}dG_3(x_1, x_2, x_3) &= G_3(x_1, x_2, x_3, t + dt) - G_3(x_1, x_2, x_3) \\ &= E[(s_1 + ds_1)(s_2 + ds_2)(s_3 + ds_3)] - G(x_1, x_2, x_3) \\ &= \sum_{\{i,j,k\} \in P} E[s_i s_j ds_k] + \sum_{\{i,j,k\} \in P} E[ds_i ds_j s_k] \\ &+ E[ds_1 ds_2 ds_3].\end{aligned}$$

First,

$$\begin{aligned}E[s_i s_j ds_k] &= E[s_i s_j r_k] dt - dq E[s_i s_j] \\ &= E[s_i s_j r_k] dt - dq G_2(x_i, x_j).\end{aligned}$$

We have

$$\begin{aligned}E[s_i s_j r_k] &= (fq - \mu q - \alpha q^2)G(x_i, x_j) \\ &+ fE[s_i s_j (\mathcal{D} \star s)(x_k)] - (\mu + \alpha q)G_3(x_i, x_j, x_k) \\ &- \alpha q E[s_i s_j (\mathcal{C} \star s)(x_k)] - R_3(x_i, x_j, x_k) \\ &= (fq - \mu q - \alpha q^2)G_2(x_i, x_j)\end{aligned}$$

$$\begin{aligned}
& + f(\mathcal{D} \star G_3)(x_k, x_i, x_j) - (\mu + \alpha q)G_3(x_i, x_j, x_k) \\
& - \alpha q(\mathcal{C} \star G_3)(x_k, x_i, x_j) - R_3(x_i, x_j, x_k).
\end{aligned}$$

where

$$\begin{aligned}
R_3(x_i, x_j, x_k) & = \alpha E[s_i s_j s_k (\mathcal{C} \star s)(x_k)] \\
& = \alpha(\mathcal{C} \star G_4)(x_k, x_i, x_j, x_k).
\end{aligned}$$

We write this as

$$\begin{aligned}
E[s_i s_j r_k] & = (fq - \mu q - \alpha q^2)g_2(x_j - x_i) \\
& + f(\mathcal{D} \star g_3)(x_k - x_i, x_j - x_i) - (\mu + \alpha q)g_3(x_j - x_i, x_k - x_i) \\
& - \alpha q(\mathcal{C} \star g_3)(x_k - x_i, x_j - x_i) - r_3(x_j - x_i, x_k - x_i),
\end{aligned}$$

where

$$r_3(x_A, x_B) = \alpha(\mathcal{C} \star g_4)(x_B, x_A, x_B).$$

Second,

$$E[ds_i ds_j s_k] = E[d\eta_i d\eta_j s_k] = E[V(x_j) s_k] \delta(x_i - x_j) dt,$$

where

$$V(x) = f(\mathcal{D} \star a)(x) + \mu a(x) + \alpha(\mathcal{C} \star a)(x)a(x),$$

and we have used the fact that  $E[d\eta_i d\eta_j s_k] = 0$  if  $x_j \neq x_i$ . We have

$$\begin{aligned}
E[V(x_j) s_k] & = fE[s_k (\mathcal{D} \star s)(x_j)] + (\mu + \alpha q)G_2(x_k, x_j) \\
& + \alpha q E[s_k (\mathcal{C} \star s)(x_j)] + R_2(x_k, x_j) \\
& = f(\mathcal{D} \star G_2)(x_j, x_k) + (\mu + \alpha q)G_2(x_k, x_j)
\end{aligned}$$

$$\begin{aligned}
& + \alpha q(\mathcal{C} \star G_2)(x_j, x_k) + R_2(x_k, x_j) \\
& = f(\mathcal{D} \star g_2)(x_j - x_k) + (\mu + \alpha q)g_2(x_j - x_k) \\
& + \alpha q(\mathcal{C} \star g_2)(x_j - x_k) + r_2(x_j - x_k).
\end{aligned}$$

Finally,

$$E[ds_1 ds_2 ds_3] = dq \delta(x_1 - x_2) \delta(x_1 - x_3).$$

Combining the above components and accounting for symmetry gives

$$\begin{aligned}
\frac{dg_3(x_1, x_2)}{dt} & = \sum_{\{x_A, x_B\} \in P'} [(fq - \mu q - \alpha q^2)g_2(x_B) \\
& + f(\mathcal{D} \star g_3)(x_A, x_B) - (\mu + \alpha q)g_3(x_A, x_B) \\
& - \alpha q(\mathcal{C} \star g_3)(x_A, x_B) - r_3(x_B, x_A) - \frac{dq}{dt}g_2(x_B)] \\
& + \sum_{\{x_A, x_B\} \in P'} [f(\mathcal{D} \star g_2)(x_A) + (\mu + \alpha q)g_2(x_A) \\
& + \alpha q(\mathcal{C} \star g_2)(x_A) + r_2(x_A)] \delta(x_B) \\
& + \frac{dq}{dt} \delta(x_1) \delta(x_2) \\
& = \sum_{\{x_A, x_B\} \in P'} [f(\mathcal{D} \star g_3)(x_A, x_B) - (\mu + \alpha q)g_3(x_A, x_B) \\
& - \alpha q(\mathcal{C} \star g_3)(x_A, x_B) - r_3(x_B, x_A) + Rg_2(x_B)] \\
& + \sum_{\{x_A, x_B\} \in P'} [f(\mathcal{D} \star g_2)(x_A) + (\mu + \alpha q)g_2(x_A) \\
& + \alpha q(\mathcal{C} \star g_2)(x_A) + r_2(x_A)] \delta(x_B) \\
& + \frac{dq}{dt} \delta(x_1) \delta(x_2),
\end{aligned}$$

where  $P' = \{(x_2, x_1), (x_1, x_2), (x_1, x_1 - x_2)\}$ .

## 1.5 The Exact Equations for the Residual Moments

To transform the differential equations for the central moments  $g_2$  and  $g_3$  to corresponding equations for the residual moments  $g_2^*$  and  $g_3^*$ , we use the equations

$$\begin{aligned}
g_2(x) &= q\delta(x) + g_2^*(x), \\
g_3(x_1, x_2) &= q\delta(x_1)\delta(x_2) + g_3^*(x_1, x_2) + \sum_{\{x_A, x_B\} \in P'} g_2^*(x_A)\delta(x_B), \\
g_4(x_1, x_2, x_3) &= q\delta(x_1)\delta(x_2)\delta(x_3) + g_4^*(x_1, x_2, x_3) \\
&+ \sum_{\{x_A, x_B, x_C\} \in P'_4} g_2^*(x_A)\delta(x_B)\delta(x_C) \\
&+ \sum_{\{x_A, x_B, x_C\} \in P'_3} [q^2 + g_2^*(x_A)]\delta(x_B)\delta(x_C) \\
&+ \sum_{\{x_A, x_B, x_C\} \in P'_6} [qg_2^*(x_A) + g_3^*(x_A, x_B)]\delta(x_C) \\
&+ \sum_{\{x_A, x_B, x_C\} \in P'_3} g_2^*(x_B)g_2^*(x_C),
\end{aligned}$$

where

$$\begin{aligned}
P'_3 &= \{\{x_2, x_1, x_3 - x_2\}, \{x_1, x_2, x_3 - x_1\}, \{x_1, x_3, x_2 - x_1\}\}, \\
P'_4 &= \{\{x_1, x_2, x_3\}, \{x_2, x_1, x_3\}, \{x_3, x_1, x_2\}, \{x_1, x_2 - x_1, x_3 - x_1\}\}, \\
P'_6 &= \{\{x_3 - x_2, -x_2, x_1\}, \{x_3 - x_1, -x_1, x_2\}, \{x_2 - x_1, -x_1, x_3\}, \{x_3, x_1, x_2 - x_1\}, \\
&\{x_2, x_1, x_3 - x_1\}, \{x_1, x_2, x_3 - x_2\}\}.
\end{aligned}$$

### 1.5.1 Mean

We have

$$\frac{dq}{dt} = (f - \mu)q - \alpha q^2 - R,$$

where

$$\begin{aligned}
R &= \alpha(\mathcal{C} \star g_2)(0) \\
&= \alpha[q\mathcal{C}(0) + (\mathcal{C} \star g_2^*)(0)].
\end{aligned}$$

### 1.5.2 Second moment

We obtain

$$\begin{aligned} \frac{dg_2^*(x)}{dt} &= 2f(\mathcal{D} \star g_2^*)(x) - 2\mu g_2^*(x) - 2\alpha q[g_2^*(x) + (\mathcal{C} \star g_2^*)(x)] \\ &+ 2fq\mathcal{D}(x) - 2\alpha q^2\mathcal{C}(x) + 2R\delta(x) - 2r_2(x). \end{aligned}$$

As

$$r_2(x) = \alpha(\mathcal{C} \star g_3)(0, x) = R\delta(x) + r_2^*(x),$$

where

$$r_2^*(x) = \alpha[(\mathcal{C} \star g_3^*)(0, x) + \mathcal{C}(x)g_2^*(x) + \mathcal{C}(0)g_2^*(x)],$$

we obtain

$$\begin{aligned} \frac{dg_2^*(x)}{dt} &= 2f(\mathcal{D} \star g_2^*)(x) - 2\mu g_2^*(x) - 2\alpha q[g_2^*(x) + (\mathcal{C} \star g_2^*)(x)] \\ &+ 2fq\mathcal{D}(x) - 2\alpha q^2\mathcal{C}(x) - 2r_2^*(x). \end{aligned}$$

### 1.5.3 Third moment

We have

$$\begin{aligned} \frac{dg_3^*(x_1, x_2)}{dt} &= \sum_{\{x_A, x_B\} \in P'} \{ [f(\mathcal{D} \star g_3)(x_A, x_B) - (\mu + \alpha q)g_3(x_A, x_B) \\ &- \alpha q(\mathcal{C} \star g_3)(x_A, x_B) - r_3(x_B, x_A) + Rg_2(x_B)] \\ &+ [f(\mathcal{D} \star g_2)(x_A) + (\mu + \alpha q)g_2(x_A) \\ &+ \alpha q(\mathcal{C} \star g_2)(x_A) + r_2(x_A) - \frac{dg_2^*(x_A)}{dt}] \delta(x_B) \}. \end{aligned} \quad (7)$$

We note that

$$r_3(x_B, x_A)$$

$$\begin{aligned}
&= \alpha(\mathcal{C} \star g_4)(x_A, x_B, x_A) \\
&= \alpha q \mathcal{C}(0) \delta(x_B) \delta(x_A) + \alpha(\mathcal{C} \star g_4^*)(x_A, x_B, x_A) \\
&+ \alpha(\mathcal{C} \star g_2^*)(0) \delta(x_B) \delta(x_A) + \alpha \mathcal{C}(0) g_2^*(x_B) \delta(x_A) \\
&+ \alpha \mathcal{C}(x_A) g_2^*(x_A) \delta(x_B) + \alpha \mathcal{C}(0) g_2^*(x_A) \delta(x_B - x_A) \\
&+ \alpha q^2 [\mathcal{C}(x_A) \delta(x_A - x_B) + \mathcal{C}(0) \delta(x_B) + \mathcal{C}(x_B) \delta(x_A)] \\
&+ \alpha [\mathcal{C}(x_B) g_2^*(x_B) \delta(x_B - x_A) + \mathcal{C}(0) g_2^*(x_A) \delta(x_B) + \mathcal{C}(x_B) g_2^*(x_B) \delta(x_A)] \\
&+ \alpha q [\mathcal{C}(x_A) g_2^*(x_A - x_B) + \mathcal{C}(x_B - x_A) g_2^*(x_A) + \mathcal{C}(0) g_2^*(x_B)] \\
&+ \alpha q [(\mathcal{C} \star g_2^*)(x_B) \delta(x_A) + (\mathcal{C} \star g_2^*)(0) \delta(x_B) + (\mathcal{C} \star g_2^*)(x_A) \delta(x_A - x_B)] \\
&+ \alpha [\mathcal{C}(x_A) g_3^*(x_A, x_B) + (\mathcal{C} \star g_3^*)(0, x_A) \delta(x_B) + (\mathcal{C} \star g_3^*)(0, x_B) \delta(x_A)] \\
&+ \alpha [\mathcal{C}(x_A - x_B) g_3^*(x_A, x_B) + \mathcal{C}(0) g_3^*(x_A, x_B) + (\mathcal{C} \star g_3^*)(0, x_A) \delta(x_A - x_B)] \\
&+ \alpha [(\mathcal{C} \star g_2^*)(x_A) g_2^*(x_A - x_B) + (\mathcal{C} \star g_2^*)(0) g_2^*(x_B) + (\mathcal{C} \star g_2^*)(x_B - x_A) g_2^*(x_A)],
\end{aligned}$$

where we have used the fact that

$$(\mathcal{C} \star g_3^*)(x, x) = (\mathcal{C} \star g_3^*)(0, x).$$

We also note that

$$(\mathcal{F} \star g_2)(x_A) = q \mathcal{F}(x_A) + (\mathcal{F} \star g_2^*)(x_A),$$

that

$$\begin{aligned}
(\mathcal{F} \star g_3)(x_A, x_B) &= q \mathcal{F}(x_A) \delta(x_B) + (\mathcal{F} \star g_3^*)(x_A, x_B) \\
&+ \mathcal{F}(x_A) g_2^*(x_B) + \mathcal{F}(x_A - x_B) g_2^*(x_B) + (\mathcal{F} \star g_2^*)(x_A) \delta(x_B),
\end{aligned}$$

and that

$$\begin{aligned}
g_3(x_A, x_B) &= q \delta(x_A) \delta(x_B) + g_3^*(x_A, x_B) \\
&+ g_2^*(x_B) \delta(x_A) + g_2^*(x_A) \delta(x_B) + g_2^*(x_A) \delta(x_A - x_B).
\end{aligned}$$

We write Eq. 7 as

$$\frac{dg_3^*(x_1, x_2)}{dt} = J\delta(x_1)\delta(x_2) + I_1(x_2)\delta(x_1) + I_2(x_1)\delta(x_2) + I_{12}(x_1)\delta(x_1 - x_2) + \text{smooth part},$$

where the coefficients of the delta distributions should vanish. To see this is the case, we note that

$$\begin{aligned} J &= -3q(\mu + \alpha q) - 3\alpha q\mathcal{C}(0) - 3\alpha(\mathcal{C} \star g_2^*)(0) + 3q(\mu + \alpha q) + 3R \\ &= 0, \end{aligned}$$

and that  $I_1(x) = I_2(x) = I_{12}(x) = I(x)$ , where

$$\begin{aligned} I(x) &= f[q\mathcal{D}(x) + (\mathcal{D} \star g_2^*)(x)] - 3(\mu + \alpha q)g_2^*(x) \\ &\quad - \alpha q^2(x) - \alpha q(\mathcal{C} \star g_2^*)(x) \\ &\quad - 2\alpha\mathcal{C}(0)g_2^*(x) - \alpha\mathcal{C}(x)g_2^*(x) - \alpha q^2\mathcal{C}(0) - 2\alpha q^2\mathcal{C}(x) \\ &\quad - 2\alpha\mathcal{C}(x)g_2^*(x) - \alpha\mathcal{C}(0)g_2^*(x) - \alpha q(\mathcal{C} \star g_2^*)(0) - 2\alpha q(\mathcal{C} \star g_2^*)(x) \\ &\quad - 3\alpha(\mathcal{C} \star g_3^*)(0, x) + \alpha q[q\mathcal{C}(0) + (\mathcal{C} \star g_2^*)(0)] \\ &\quad + f q\mathcal{D}(x) + f(\mathcal{D} \star g_2^*)(x) + (\mu + \alpha q)g_2^*(x) \\ &\quad + \alpha q^2\mathcal{C}(x) + \alpha q(\mathcal{C} \star g_2^*)(x) \\ &\quad + \alpha(\mathcal{C} \star g_3^*)(0, x) + \alpha\mathcal{C}(x)g_2^*(x) + \alpha\mathcal{C}(0)g_2^*(x) \\ &\quad - 2f(\mathcal{D} \star g_2^*)(x) + 2\mu g_2^*(x) + 2\alpha q[g_2^*(x) + (\mathcal{C} \star g_2^*)(x)] \\ &\quad - 2f q\mathcal{D}(x) + 2\alpha q^2\mathcal{C}(x) \\ &\quad + 2\alpha[(\mathcal{C} \star g_3^*)(0, x) + \mathcal{C}(x)g_2^*(x) + \mathcal{C}(0)g_2^*(x)] \\ &= 0. \end{aligned}$$

Combining the smooth terms we finally get

$$\frac{dg_3^*(x_1, x_2)}{dt}$$

$$\begin{aligned}
&= \Sigma_{\{x_A, x_B\} \in P'} \{f(\mathcal{D} \star g_3^*)(x_A, x_B) + f\mathcal{D}(x_A)g_2^*(x_B) + f\mathcal{D}(x_A - x_B)g_2^*(x_B) \\
&- (\mu + \alpha q)g_3^*(x_A, x_B) - \alpha q(\mathcal{C} \star g_3^*)(x_A, x_B) - \alpha q\mathcal{C}(x_A)g_2^*(x_B) - \alpha q\mathcal{C}(x_A - x_B)g_2^*(x_B) \\
&- \alpha(\mathcal{C} \star g_4^*)(x_A, x_B, x_A) - \alpha q[\mathcal{C}(x_A)g_2^*(x_A - x_B) + \mathcal{C}(x_B - x_A)g_2^*(x_A) + \mathcal{C}(0)g_2^*(x_B)] \\
&- \alpha[\mathcal{C}(x_A)g_3^*(x_A, x_B) + \mathcal{C}(x_A - x_B)g_3^*(x_A, x_B) + \mathcal{C}(0)g_3^*(x_A, x_B)] \\
&- \alpha[(\mathcal{C} \star g_2^*)(x_A)g_2^*(x_A - x_B) + (\mathcal{C} \star g_2^*)(0)g_2^*(x_B) + (\mathcal{C} \star g_2^*)(x_B - x_A)g_2^*(x_A)] \\
&+ Rg_2^*(x_B) \\
&= \Sigma_{\{x_A, x_B\} \in P'} \{f(\mathcal{D} \star g_3^*)(x_A, x_B) - (\mu + \alpha q)g_3^*(x_A, x_B) - \alpha q(\mathcal{C} \star g_3^*)(x_A, x_B) \\
&+ f[\mathcal{D}(x_A) + \mathcal{D}(x_A - x_B)]g_2^*(x_B) - 2\alpha q[\mathcal{C}(x_A) + \mathcal{C}(x_A - x_B)]g_2^*(x_B) \\
&- \alpha[(\mathcal{C} \star g_2^*)(x_A) + (\mathcal{C} \star g_2^*)(x_A - x_B)]g_2^*(x_B) - r_3^*(x_A, x_B)\},
\end{aligned}$$

where

$$\begin{aligned}
r_3^*(x_A, x_B) &= \alpha(\mathcal{C} \star g_4^*)(x_A, x_B, x_A) \\
&+ \alpha[\mathcal{C}(x_A)g_3^*(x_A, x_B) + \mathcal{C}(x_A - x_B)g_3^*(x_A, x_B) + \mathcal{C}(0)g_3^*(x_A, x_B)].
\end{aligned}$$

## 1.6 The Fourier Transformed Exact Equations

To work out the systematic perturbation equation from the exact equations, it is convenient to transform the equations to the Fourier domain. To do so, we denote by  $\tilde{\cdot}$  the Fourier transform over all spatial coordinates, so that

$$\begin{aligned}
\tilde{g}_2^*(\omega) &= \int g_2^*(x) e^{-2\pi i \omega x} dx, \\
\tilde{g}_3^*(\omega_1, \omega_2) &= \int \int g_3^*(x_1, x_2) e^{-2\pi i(\omega_1 x_1 + \omega_2 x_2)} dx_2 dx_1, \\
\tilde{g}_4^*(\omega_1, \omega_2, \omega_3) &= \int \int \int g_4^*(x_1, x_2, x_3) e^{-2\pi i(\omega_1 x_1 + \omega_2 x_2 + \omega_3 x_3)} dx_3 dx_2 dx_1.
\end{aligned}$$

We note the symmetries  $\tilde{g}_3^*(\omega_1, \omega_2) = \tilde{g}_3^*(\omega_2, \omega_1) = \tilde{g}_3^*(\omega_1 + \omega_2, -\omega_2)$ .

### 1.6.1 First moment

For the first moment we obtained

$$\frac{dq}{dt} = (f - \mu)q - \alpha q^2 - R,$$

where we write  $R$  now as

$$R = \alpha[q\mathcal{C}(0) + \int \tilde{\mathcal{C}}(\omega)\tilde{g}_2^*(\omega)]d\omega.$$

### 1.6.2 Second moment

For the second moment we obtain

$$\frac{d\tilde{g}_2^*(\omega)}{dt} = 2\tilde{A}(\omega)\tilde{g}_2^*(\omega) + 2fq\tilde{\mathcal{D}}(\omega) - 2\alpha q^2\tilde{\mathcal{C}}(\omega) - 2\tilde{r}_2^*(\omega),$$

where

$$\tilde{A}(\omega, t) = f\tilde{\mathcal{D}}(\omega) - \mu - \alpha q(t)[1 + \tilde{\mathcal{C}}(\omega)], \quad (8)$$

and

$$\tilde{r}_2^*(\omega) = \alpha \left[ \int_{\omega'} \tilde{\mathcal{C}}(\omega')\tilde{g}_3^*(\omega', \omega)d\omega' + (\tilde{\mathcal{C}} \star \tilde{g}_2^*)(\omega) + \mathcal{C}(0)\tilde{g}_2^*(\omega) \right].$$

### 1.6.3 Third moment

Let us define  $P'' = \{\omega_1, \omega_2, \omega_1 + \omega_2\}$ . For any kernel  $\mathcal{F}$ , we have the identities

$$\begin{aligned} & \Sigma_{\{x_A, x_B\} \in P'} \int \int (\mathcal{F} \star g_3^*)(x_A, x_B) e^{-2\pi i(\omega_1 x_1 + \omega_2 x_2)} dx_2 dx_1 \\ = & \Sigma_{\omega \in P''} \tilde{\mathcal{F}}(\omega) \tilde{g}_3^*(\omega_1, \omega_2), \\ & \Sigma_{\{x_A, x_B\} \in P'} \int \int \mathcal{F}(x_A) g_3^*(x_A, x_B) e^{-2\pi i(\omega_1 x_1 + \omega_2 x_2)} dx_2 dx_1 \\ = & 2(\tilde{\mathcal{F}} \star \tilde{g}_3^*)(\omega_1, \omega_2) + (\tilde{\mathcal{F}} \star \tilde{g}_3^*)(\omega_2, \omega_1), \\ & \Sigma_{\{x_A, x_B\} \in P'} \int \int \mathcal{F}(x_A - x_B) g_3^*(x_A, x_B) e^{-2\pi i(\omega_1 x_1 + \omega_2 x_2)} dx_2 dx_1 \\ = & (\tilde{\mathcal{F}} \star \tilde{g}_3^*)(\omega_2, \omega_1) (\tilde{\mathcal{F}} \star \tilde{g}_3^*)(-\omega_2, \omega_1 + \omega_2) + (\tilde{\mathcal{F}} \star \tilde{g}_3^*)(-\omega_1, \omega_1 + \omega_2). \end{aligned}$$

Furthermore,

$$\begin{aligned} & \Sigma_{\{x_A, x_B\} \in P'} \int \int [\mathcal{F}(x_A) + \mathcal{F}(x_A - x_B)] g_2^*(x_B) e^{-2\pi i(\omega_1 x_1 + \omega_2 x_2)} dx_2 dx_1 \\ &= \Sigma_{\{\omega, \omega'\} \in P'''} \tilde{\mathcal{F}}(\omega) \tilde{g}_2^*(\omega'), \end{aligned}$$

where  $P''' = \{(\omega, \omega') | \omega, \omega' \in P'', \omega' \neq \omega\}$ . We thus obtain

$$\begin{aligned} \frac{d\tilde{g}_3^*(\omega_1, \omega_2)}{dt} &= [\Sigma_{\omega \in P''} \tilde{A}(\omega)] \tilde{g}_3^*(\omega_1, \omega_2) + \Sigma_{\{\omega, \omega'\} \in P'''} \tilde{B}(\omega) \tilde{g}_2^*(\omega') \\ &\quad - \tilde{r}_3^*(\omega_1, \omega_2), \end{aligned}$$

where

$$\tilde{B}(\omega) = f\tilde{\mathcal{D}}(\omega) - 2\alpha q\tilde{\mathcal{C}}(\omega) - \alpha\tilde{\mathcal{C}}(\omega)\tilde{g}_2^*(\omega),$$

and

$$\begin{aligned} & \tilde{r}_3(\omega_1, \omega_2) \\ &= \alpha \int \tilde{\mathcal{C}}(\omega) [\tilde{g}_4^*(\omega, \omega_1, \omega_2 - \omega) + \tilde{g}_4^*(\omega, \omega_2, \omega_1 - \omega) + \tilde{g}_4^*(\omega, -\omega_2, \omega_1 + \omega_2 - \omega)] d\omega \\ &+ 2\alpha(\tilde{\mathcal{C}} \star \tilde{g}_3^*)(\omega_1, \omega_2) + 2\alpha(\tilde{\mathcal{C}} \star \tilde{g}_3^*)(\omega_2, \omega_1) \\ &+ \alpha(\tilde{\mathcal{C}} \star \tilde{g}_3^*)(-\omega_2, \omega_1 + \omega_2) + \alpha(\tilde{\mathcal{C}} \star \tilde{g}_3^*)(-\omega_1, \omega_1 + \omega_2) \\ &+ 3\alpha\mathcal{C}(0)\tilde{g}_3^*(\omega_1, \omega_2). \end{aligned}$$

## 1.7 The Perturbation Expansion

The final step in deriving the perturbation expansion is to expand all terms into power series of  $L^{-d}$  and to match the terms of the same orders. To do this, we write  $\mathcal{D}(x) = \mathcal{D}_0(x/L)/L^d$ ,  $\mathcal{C}(x) = \mathcal{C}_0(x/L)/L^d$ , where  $\mathcal{C}_0$  and  $\mathcal{D}_0$  are independent of the length scale  $L = L_D = L_C$ . We note that  $\tilde{\mathcal{D}}(\omega) = \tilde{\mathcal{D}}_0(L\omega)$  and  $\tilde{\mathcal{C}}(\omega) = \tilde{\mathcal{C}}_0(L\omega)$ . The expansions are given as

$$q = \Sigma_{i=0}^{\infty} q^{(i)} L^{-di},$$

$$\begin{aligned}
\tilde{g}_2^*(\omega) &= \sum_{i=0}^{\infty} \tilde{g}_2^{*(i)}(L\omega)L^{-di}, \\
\tilde{g}_3^*(\omega_1, \omega_2) &= \sum_{i=0}^{\infty} \tilde{g}_3^{*(i)}(L\omega_1, L\omega_2)L^{-di}, \\
\tilde{A}(\omega) &= \sum_{i=0}^{\infty} \tilde{A}^{(i)}(L\omega)L^{-di}, \\
\tilde{B}(\omega) &= \sum_{i=0}^{\infty} \tilde{B}^{(i)}(L\omega)L^{-di}, \\
R &= \sum_{i=1}^{\infty} R^{(i)}L^{-di}, \\
\tilde{r}_2^*(\omega) &= \sum_{i=1}^{\infty} \tilde{r}_2^{*(i)}(L\omega)L^{-di}, \\
\tilde{r}_3^*(\omega_1, \omega_2) &= \sum_{i=1}^{\infty} \tilde{r}_3^{*(i)}(L\omega_1, L\omega_2)L^{-di},
\end{aligned}$$

where we have accounted for the fact that the residual terms  $R$ ,  $\tilde{r}_2^*$  and  $\tilde{r}_3^*$  do not have a zeroth-order term.

### 1.7.1 Mean-field

Collecting the terms of the zeroth order gives the mean-field model,

$$\frac{dq^{(0)}}{dt} = (f - \mu)q^{(0)} - \alpha q^{(0)2}.$$

### 1.7.2 First order

Collecting the terms of order  $L^{-d}$  gives

$$\begin{aligned}
\frac{dq^{(1)}}{dt} &= (f - \mu)q^{(1)} - 2\alpha q^{(0)}q^{(1)} - R^{(1)}, \\
R^{(1)} &= \alpha q^{(0)}\mathcal{C}_0(0) + \alpha \int \tilde{\mathcal{C}}_0(\omega)\tilde{g}_2^{*(0)}(\omega)d\omega, \\
\frac{d\tilde{g}_2^{*(0)}(\omega)}{dt} &= 2\tilde{A}^{(0)}(\omega)\tilde{g}_2^{*(0)}(\omega) + 2fq^{(0)}\tilde{\mathcal{D}}_0(\omega) - 2\alpha q^{(0)2}\tilde{\mathcal{C}}_0(\omega), \\
\tilde{A}^{(0)}(\omega) &= f\tilde{\mathcal{D}}_0(\omega) - \mu - \alpha q^{(0)}[1 + \tilde{\mathcal{C}}_0(\omega)].
\end{aligned}$$

### 1.7.3 Second order

Finally, collecting the terms of order  $L^{-2d}$  gives

$$\frac{dq^{(2)}}{dt} = (f - \mu)q^{(2)} - \alpha q^{(1)2} - 2\alpha q^{(0)}q^{(2)} - R^{(2)},$$

$$\begin{aligned}
R^{(2)} &= \alpha q^{(1)} \mathcal{C}_0(0) + \alpha \int \tilde{\mathcal{C}}_0(\omega) \tilde{g}_2^{*(1)}(\omega) d\omega, \\
\frac{d\tilde{g}_2^{*(1)}(\omega)}{dt} &= 2\tilde{A}^{(0)}(\omega) \tilde{g}_2^{*(1)}(\omega) + 2\tilde{A}^{(1)}(\omega) \tilde{g}_2^{*(0)}(\omega) \\
&\quad + 2f q^{(1)} \tilde{\mathcal{D}}_0(\omega) - 4\alpha q^{(0)} q^{(1)} \tilde{\mathcal{C}}_0(\omega) - 2\tilde{r}_2^{*(1)}(\omega), \\
\tilde{A}^{(1)}(\omega) &= -\alpha q^{(1)} [1 + \tilde{\mathcal{C}}_0(\omega)], \\
\tilde{r}_2^{*(1)}(\omega) &= \alpha \left[ \int_{\omega'} \tilde{\mathcal{C}}_0(\omega') \tilde{g}_3^{*(0)}(\omega', \omega) d\omega' + (\tilde{\mathcal{C}}_0 \star \tilde{g}_2^{*(0)})(\omega) + \mathcal{C}_0(0) \tilde{g}_2^{*(0)}(\omega) \right], \\
\frac{d\tilde{g}_3^{(0)}(\omega_1, \omega_2)}{dt} &= [\Sigma_{\omega \in P''} \tilde{A}^{(0)}(\omega)] \tilde{g}_3^{(0)}(\omega_1, \omega_2) + \Sigma_{\{\omega, \omega'\} \in P'''} \tilde{B}^{(0)}(\omega) \tilde{g}_2^{*(0)}(\omega'), \\
\tilde{B}^{(0)}(\omega) &= f \tilde{\mathcal{D}}_0(\omega) - 2\alpha q^{(0)} \tilde{\mathcal{C}}_0(\omega) - \alpha \tilde{\mathcal{C}}_0(\omega) \tilde{g}_2^{*(0)}(\omega).
\end{aligned}$$

The equations are closed and can be solved numerically, which gives the expansion  $q(t) = q^{(0)}(t) + q^{(1)}(t)/L^d + q^{(2)}(t)/L^{2d} + \dots$

## 2 Asymptotic Exactness of Symmetric Closures

Here we show that the symmetric power-1, power-2, and power-3 closures are asymptotically exact, but that the asymmetric closures fail to do so. The formulae for the closures are from ref. 1.

### 2.1 Power-1

The general power-1 closure is given by

$$z_3^*(x_1, x_2) = \frac{1}{\beta} [\alpha q z_2^*(x_2 - x_1) + \beta q z_2^*(x_2) + \gamma q z_2^*(x_1) - (\alpha + \gamma) q^3].$$

As discussed in Section 1.3, the approximation is asymptotically exact if and only if the closure is consistent with Eq. 3 in the sense that the remaining residual moment satisfies the conditions (C1) and (C2). It is easy to see that this is the case if and only if the closure is symmetric, i.e.,  $\alpha = \beta = \gamma$ .

## 2.2 Power-2

Similarly, the general power-2 closure is given by

$$z_3^*(x_1, x_2) = \frac{\alpha z_2^*(x_1)z_2^*(x_2) + \beta z_2^*(x_1)z_2^*(x_2 - x_1) + \gamma z_2^*(x_2)z_2^*(x_2 - x_1) - \beta q^4}{q(\alpha + \gamma)},$$

which is consistent with Eq. 3 if and only if  $\alpha = \beta = \gamma$ .

## 2.3 Power-3

The symmetric power-3 closure is given by

$$z_3^*(x_1, x_2) = \frac{z_2^*(x_1)z_2^*(x_2)z_2^*(x_2 - x_1)}{q^3},$$

which is consistent with Eq. 3.

1. Murrell, D.J., Dieckmann, U. & Law, R. (2004). *J. Theor. Biol.* **229**, 421-432.
