# Supplementary material
Source: PubMed Central journal article supplement (PMC1568924)
Supplement: pnas_0603994103_2.pdf [file pnas_0603994103_2.pdf]

**Table 1.** Here  $g = g(x) = f(\mathcal{D} \star a)(x)$  and  $m = m(x) = \mu + \alpha(\mathcal{C} \star a)(x)$ .

| Variable          | No change          | Death                   | Birth                  |
|-------------------|--------------------|-------------------------|------------------------|
| $a(x)$            | $k/dx$             | $k/dx$                  | $k/dx$                 |
| $a(x, t + dt)$    | $k/dx$             | $(k - 1)/dx$            | $(k + 1)/dx$           |
| $da(x)$           | 0                  | $-1/dx$                 | $1/dx$                 |
| $P(\text{event})$ | $1 - [km + gdx]dt$ | $kmdt$                  | $gdxdt$                |
| $E[da(x)]$        | $[-km/dx + g]dt$   | $[-km/dx + g]dt$        | $[-km/dx + g]dt$       |
| $d\eta(x)$        | $[km/dx - g]dt$    | $-1/dx + [km/dx - g]dt$ | $1/dx + [km/dx - g]dt$ |
